# Supplementary material for: PEGylated dendrimer-entrapped gold nanoparticles with low immunogenicity for targeted gene delivery
Source: Royal Society of Chemistry journal article supplement (doi:10.1039/c7ra11901a), 2018-01-01

**Supporting information**

**PEGylated dendrimer-entrapped gold nanoparticles with low immunogenicity for targeted gene delivery**

Bei Xu, Aijun Li, Xinxin Hao, Rui Guo, Xiangyang Shi\* and Xueyan Cao\*

College of Chemistry, Chemical Engineering and Biotechnology, Donghua University, Shanghai  
201620, People's Republic of China

**Figure S1.** The relative expression levels of IL-6 and TNF- $\alpha$  in macrophage cells stimulated by vectors/pDNA complexes determined by qRT-PCR analysis. Cells treated with pDNA was used as a negative control (Cell). The cells treated with lipofectamine 2000 and pDNA was used as a positive control (Lipo/pDNA).

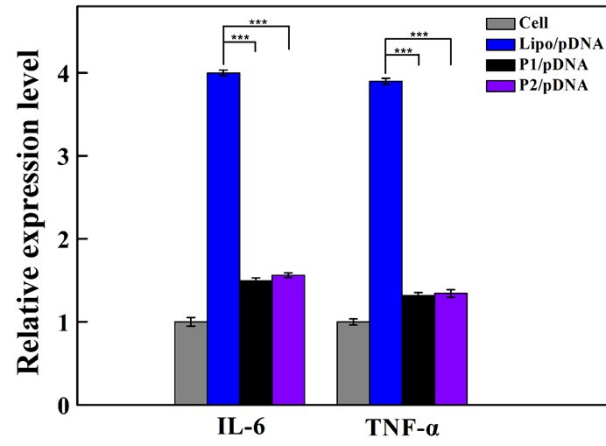

**Figure S2.** The relative expression levels of IL-6 and TNF- $\alpha$  in macrophage cells stimulated by vectors/CpG DNA complexes determined by qRT-PCR analysis. Cells without treatment was used as a negative control (Cell). The cells treated with lipofectamine 2000 and CpG DNA was used as a positive control (Lipo/CpG).

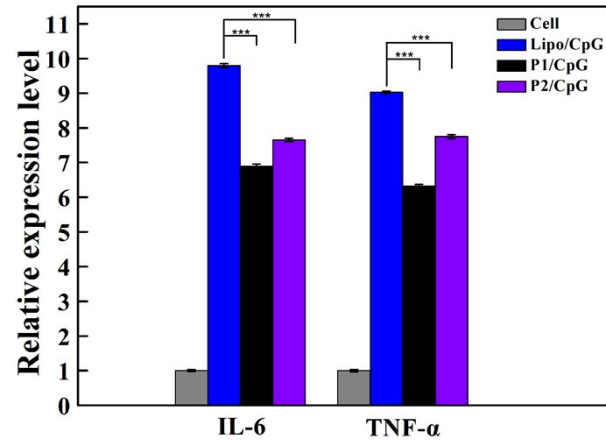

Supplement: c7ra11901a1.pdf [file c7ra11901a1.pdf]
